# Supplementary material for: Functional attrition and Quality of Life in Advanced Cancer Trial: modeling patients’ trajectories and evaluating the impact of missing outcome data handling on quality-of-life predictive model performance
Source: Research Square preprint supplement (doi:10.21203/rs.3.rs-8407124/v1), 2026-01-19
Supplement: Supplementary file 1 [file 421cf424c054c9d4f2d624b6.docx]

**Functional attrition and Quality of Life in Advanced Cancer Trial: modeling patients’ trajectories and evaluating the impact of missing outcome data handling on quality-of-life prognostic.**

**Supplementary File: Additional Tables**

**Table S1.** Baseline characteristics by state (A, F, D) at week 12 and week 24

| **Baseline characteristics by state (A, F, D) at week 12** | | | | |
| --- | --- | --- | --- | --- |
| Characteristic | Active (n =192) | Death (n = 58) | Attrition (n = 102) | p-value |
| **Age, mean (SD)** | 64.8 (10.3) | 69.2 (9.0) | 64.0 (9.3) | 0.004 |
| **Male sex, n (%)** | 114 (59.4) | 28 (48.3) | 54 (52.9) | 0.264 |
| **ECOG performance, mean (SD)** | 0.85 (0.60) | 1.31 (0.65) | 0.90 (0.57) | <0.001 |
| **Baseline FACT, mean (SD)** | 76.3 (15.6) | 66.3 (16.9) | 73.3 (16.4) | <0.001 |
| **Baseline HADS-Anxiety, mean (SD)** | 6.8 (3.2) | 7.4 (3.9) | 7.9 (3.8) | 0.033 |
| **Baseline HADS-Depression, mean (SD)** | 4.9 (3.7) | 7.9 (4.5) | 5.8 (4.6) | <0.001 |
| **Tumor type, n (%)** |  |  |  | 0.334 |
| – Esophageal/GEJ/Gastric | 15 (7.8) | 3 (5.2) | 10 (9.8) |  |
| – Hepatic/Biliary/Pancreatic/Other | 53 (27.6) | 23 (39.7) | 35 (34.3) |  |
| – Lung | 124 (64.6) | 32 (55.2) | 57 (55.9) |  |
| **Arm 2, n (%)** | 100 (52.1) | 32 (55.2) | 51 (50.0) | 0.820 |
| **Education, n (%)** |  |  |  | 0.096 |
| – College+ | 110 (58.8) | 26 (46.4) | 41 (42.7) |  |
| – High school | 62 (33.2) | 24 (42.9) | 42 (43.8) |  |
| – Low | 15 (8.0) | 6 (10.7) | 13 (13.5) |  |
| **Race/ethnicity, n (%)** |  |  |  | 0.972 |
| – Asian | 8 (4.3) | 2 (3.5) | 4 (4.4) |  |
| – Black | 22 (11.7) | 6 (10.5) | 14 (15.4) |  |
| – Minority | 3 (1.6) | 1 (1.8) | 2 (2.2) |  |
| – White | 155 (82.4) | 48 (84.2) | 71 (78.0) |  |
| **Not married, n (%)** | 65 (34.6) | 24 (42.1) | 41 (41.0) | 0.424 |
| **Number of visits, mean (SD)** | 1.64 (1.91) | 2.41 (2.85) | 1.79 (2.81) | 0.092 |
| **Caregiver present, n (%)** | 142 (74.0) | 41 (70.7) | 65 (63.7) | 0.187 |
| **Baseline characteristics by state (A, F, D) at week 24** | | | | |
| Characteristic | Active (n = 148) | Death (n = 110) | Attrition (n = 94) | p-value |
| **Age, mean (SD)** | 65.0 (10.4) | 66.3 (9.8) | 64.5 (9.3) | 0.373 |
| **Male sex, n (%)** | 82 (55.4) | 58 (52.7) | 56 (59.6) | 0.615 |
| **ECOG performance, mean (SD)** | 0.80 (0.58) | 1.13 (0.64) | 0.96 (0.60) | <0.001 |
| **Baseline FACT, mean (SD)** | 76.7 (15.7) | 69.5 (17.0) | 74.2 (15.9) | 0.002 |
| **Baseline HADS-Anxiety, mean (SD)** | 7.3 (3.3) | 7.1 (3.6) | 7.3 (3.8) | 0.927 |
| **Baseline HADS-Depression, mean (SD)** | 5.0 (3.7) | 6.7 (4.6) | 5.5 (4.3) | 0.004 |
| **Tumor type, n (%)** |  |  |  | 0.532 |
| – Esophageal/GEJ/Gastric | 8 (5.4) | 10 (9.1) | 10 (10.6) |  |
| – Hepatic/Biliary/Pancreatic/Other | 48 (32.4) | 37 (33.6) | 26 (27.7) |  |
| – Lung | 92 (62.2) | 63 (57.3) | 58 (61.7) |  |
| **Arm 2, n (%)** | 80 (54.1) | 60 (54.5) | 43 (45.7) | 0.366 |
| **Education, n (%)** |  |  |  | 0.855 |
| – College+ | 75 (52.4) | 53 (50.5) | 49 (53.8) |  |
| – High school | 54 (37.8) | 43 (41.0) | 31 (34.1) |  |
| – Low | 14 (9.8) | 9 (8.6) | 11 (12.1) |  |
| **Race/ethnicity, n (%)** |  |  |  | 0.683 |
| – Asian | 7 (4.9) | 3 (2.8) | 4 (4.7) |  |
| – Black | 17 (11.8) | 10 (9.4) | 15 (17.4) |  |
| – Minority | 3 (2.1) | 2 (1.9) | 1 (1.2) |  |
| – White | 117 (81.2) | 91 (85.8) | 66 (76.7) |  |
| **Not married, n (%)** | 52 (35.6) | 45 (42.5) | 33 (35.5) | 0.476 |
| **Number of visits, mean (SD)** | 1.69 (1.95) | 2.35 (3.07) | 1.37 (1.95) | 0.010 |
| **Caregiver present, n (%)** | 108 (73.0) | 75 (68.2) | 65 (69.1) | 0.670 |

| **Variable** | **Outcome A** | **Outcome F** | **Outcome D** |
| --- | --- | --- | --- |
| **Average Marginal Effects (AME) for Transitions T0 → T12** | | | |
| Age (per year) | -0.004 | -0.002 | +0.006 |
| **ECOG (per unit)** | **-0.082** | **-0.042** | **+0.124** |
| FACT baseline (per point) | +0.002 | +0.001 | -0.003 |
| **Anxiety (HADS-A, per point)** | -0.002 | +0.018 | **-0.016** |
| **Depression (HADS-D, per point)** | -0.009 | -0.008 | **+0.017** |
| Male (vs Female) | +0.050 | -0.019 | -0.031 |
| Tumor: Hepatobiliary vs Esophageal/GEJ | -0.033 | -0.010 | +0.042 |
| Tumor: Lung vs Esophageal/GEJ | +0.104 | -0.061 | -0.042 |
| **Caregiver present (Yes vs No)** | **+0.109** | **-0.096** | **-0.013** |
| **Average Marginal Effects (AME) for Transitions T12 → T24** | | | |
| Age (per year) | +0.001 | -0.001 | ≈0.000 |
| **ECOG (per unit)** | **-0.097** | **+0.066** | **+0.032** |
| FACT baseline (per point) | +0.002 | ≈0.000 | -0.002 |
| Anxiety (HADS-A, per point) | +0.027 | -0.010 | -0.017 |
| Male (vs Female) | -0.008 | +0.027 | -0.019 |
| **Tumor: Hepatobiliary vs Esophageal/GEJ** | **+0.297** | **-0.021** | **-0.277** |
| **Tumor: Lung vs Esophageal/GEJ** | **+0.210** | **-0.010** | **-0.200** |
| Arm 2 vs Arm 1 | +0.076 | -0.041 | -0.035 |

**Table S2. Average Marginal Effects (AME) for Transitions T0 → T12 and T12 → T24**
Change in predicted probability of each outcome associated with a one-unit increase in the covariate; reference categories: Female, Esophageal/GEJ/Gastric, No caregiver, College+

**Note:** AMEs represent the average change in predicted probability of each outcome associated with a one-unit increase in the covariate (for continuous predictors) or a shift from the reference to the comparison category (for categorical predictors). Values are expressed in probability points (e.g., 0.10 = 10 percentage points). For interpretation, consider the magnitude in absolute probability points: <0.01 ≈ negligible, 0.01–0.05 small, 0.05–0.10 moderate, >0.10 large. These thresholds are intended as pragmatic guidance rather than strict rules.

**Table S3. Predicted Probabilities for T0 → T12 and T12 → T24 Transitions by Clinical Profile**

| **Clinical Profile** | **Active (A)** | **Functional attrition (F)** | **Death (D)** |
| --- | --- | --- | --- |
| **Predicted Probabilities for T0 → T12 Transitions by Clinical Profile** | | | |
| Young fit, low anxiety, caregiver, Esophageal/GEJ/Gastric, College+ | **0.754** | 0.222 | 0.024 |
| Young fit, high anxiety, caregiver, Esophageal/GEJ/Gastric, College+ | **0.647** | 0.341 | 0.012 |
| Old fragile, low anxiety, caregiver, Hepatic/Biliary/Pancreatic/Unknown primary, Low | 0.336 | 0.267 | **0.397** |
| Old fragile, high anxiety, caregiver, Hepatic/Biliary/Pancreatic/Unknown primary, Low | 0.281 | **0.380** | 0.339 |
| Young fit, low anxiety, no caregiver, Esophageal/GEJ/Gastric, College+ | **0.640** | 0.333 | 0.028 |
| Young fit, high anxiety, no caregiver, Esophageal/GEJ/Gastric, College+ | **0.511** | 0.476 | 0.013 |
| Old fragile, low anxiety, no caregiver, Hepatic/Biliary/Pancreatic/Unknown primary, Low | 0.249 | 0.349 | **0.402** |
| Old fragile, high anxiety, no caregiver, Hepatic/Biliary/Pancreatic/Unknown primary, Low | 0.198 | **0.475** | 0.327 |
| **Predicted Probabilities for T12 → T24 Transitions by Clinical Profile** | | | |
| Young fit, high anxiety, Esophageal/GEJ, Arm1 | **0.679** | 0.189 | 0.131 |
| Young fit, low anxiety, Lung, Arm1 | **0.560** | 0.268 | 0.172 |
| Young fit, high anxiety, Lung, Arm1 | **0.802** | 0.163 | 0.034 |
| Old fragile, low anxiety, Hepatic/Biliary, Arm2 | **0.548** | 0.339 | 0.113 |
| Old fragile, high anxiety, Hepatic/Biliary, Arm2 | **0.775** | 0.203 | 0.022 |
| Old fragile, low anxiety, Lung, Arm2 | **0.431** | 0.275 | 0.294 |
| Old fragile, high anxiety, Lung, Arm2 | **0.732** | 0.198 | 0.070 |

**Note:** Probabilities of being in A, F, or D are calculated relative to being active (A) in the previous state.

| Threshold for QoL deterioration (FACT score change) | Total patients (n) | Events, n (%) |
| --- | --- | --- |
| ≥ 0 | 137 | 60 (43.8) |
| ≥ –5 | 137 | 32 (23.4) |
| ≥ –7 | 137 | 27 (19.7) |
| ≥ –10 | 137 | 23 (16.8) |

**Table S4. Incidence of quality-of-life (QoL) deterioration across different thresholds of FACT score change.**

**Table S5. Summary of parameter estimates under different truncation bounds.**

| Truncation Bounds | ESS | Min | Q1 | Median | Mean | Q3 | Max |
| --- | --- | --- | --- | --- | --- | --- | --- |
| 1–99% | 126.9 | 0.690 | 0.866 | 1.011 | 1.064 | 1.143 | 2.190 |
| 5–95% | 129.2 | 0.717 | 0.866 | 1.011 | 1.051 | 1.143 | 1.718 |
| 10–90% | 131.6 | 0.773 | 0.866 | 1.011 | 1.036 | 1.143 | 1.466 |

**Supplementary File: Additional Figures**


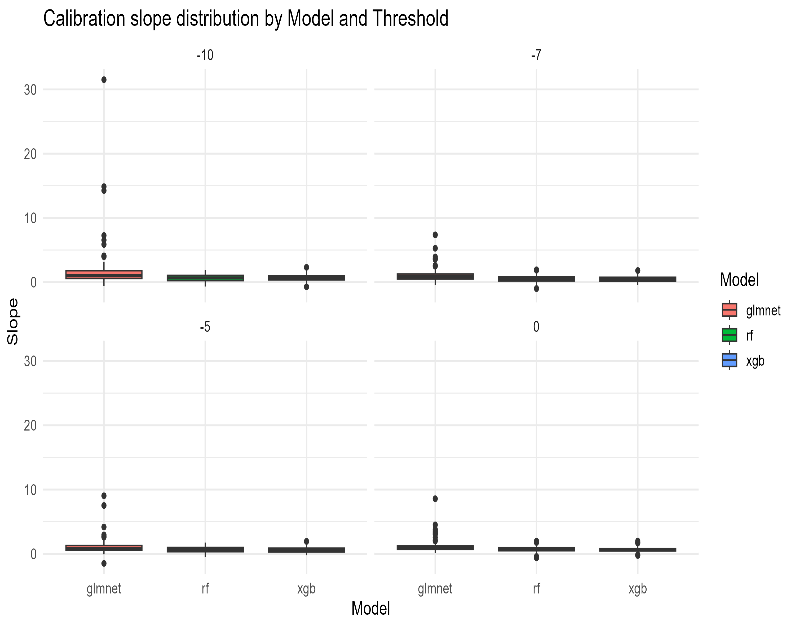

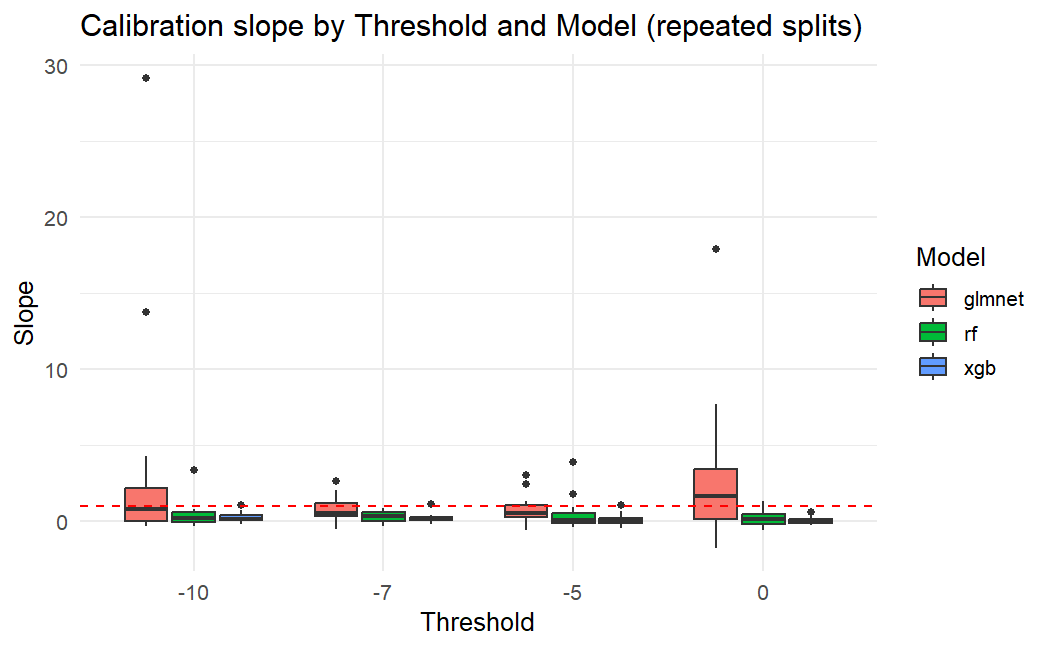

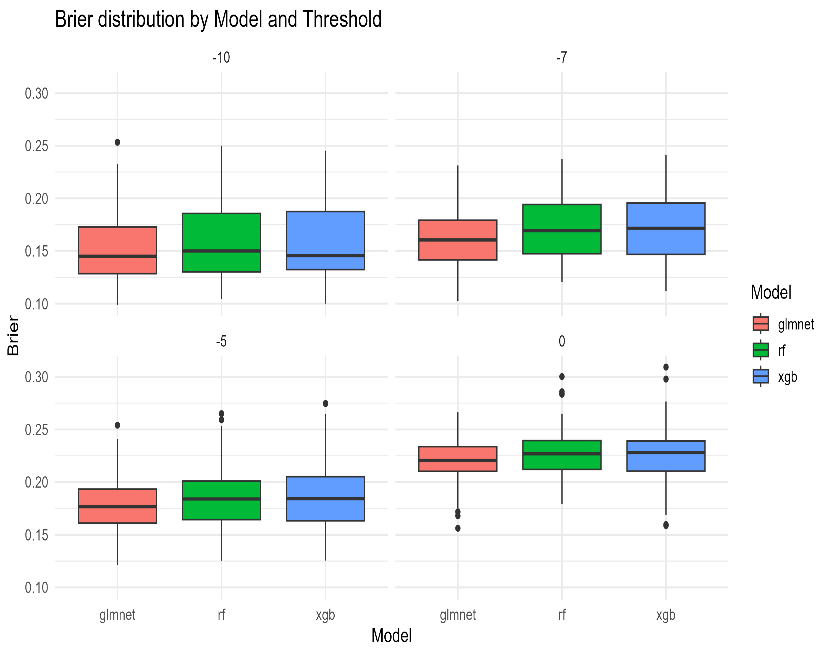

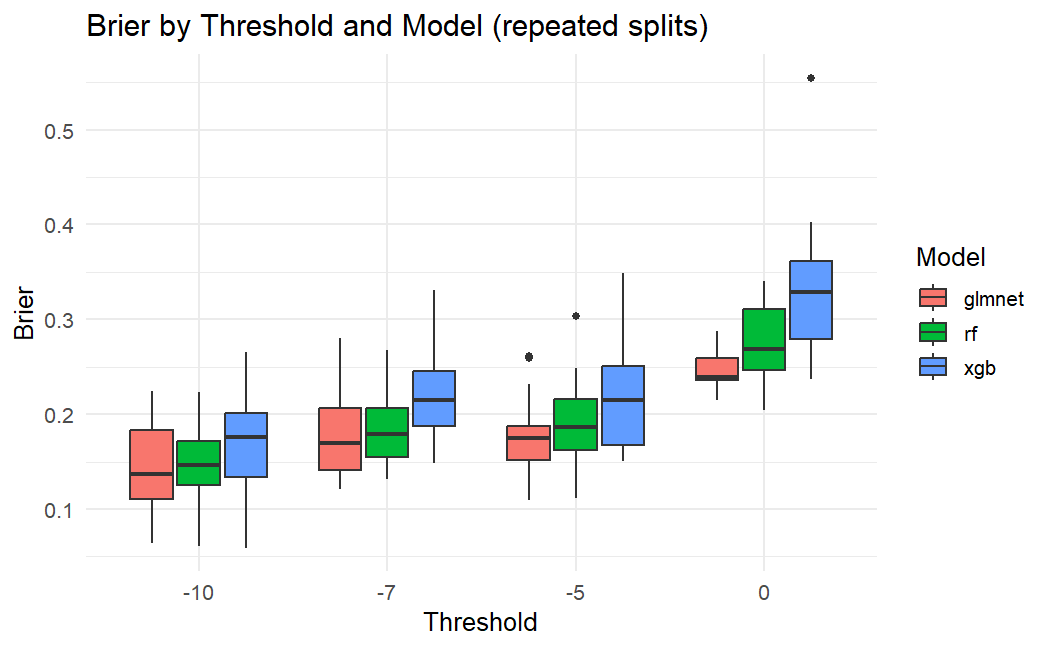

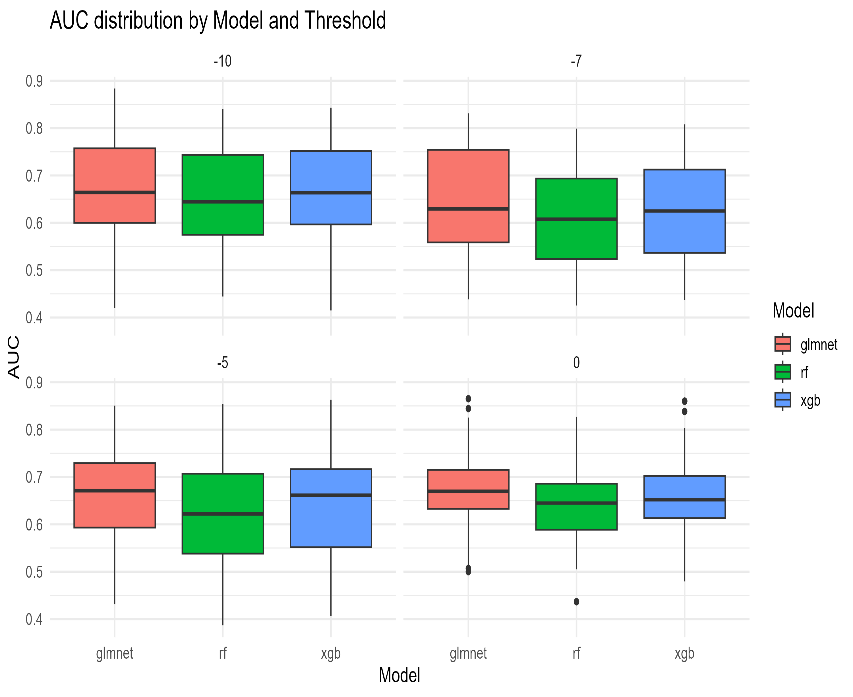

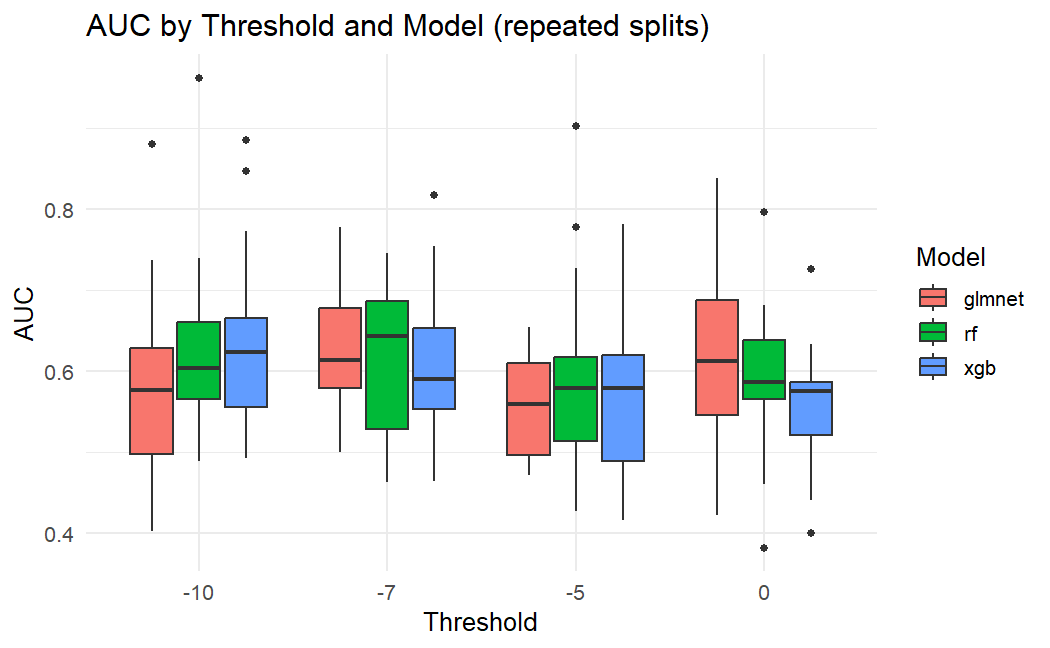


**figure S1.** Comparison of Model discrimination, accuracy and Calibration
